# Supplementary material
Source: MDPI journal article supplement (https://www.mdpi.com/2076-3417/11/20/9615)
Supplement: s1 [file s1]

# Supplementary Material

## Risk Assessment and Source Apportionment of Heavy Metals in Soils from Handan City

Haixia Zhang<sup>1,2\*</sup>, Angzu Cai<sup>1,2</sup>, Xiaojian Wang<sup>1,2</sup>, Litao Wang<sup>1,2</sup>, Qing Wang<sup>1,2</sup>, Xiaoqi Wu<sup>1,2</sup> and Yingqun Ma<sup>3\*</sup>

<sup>1</sup> College of Energy and Environment Engineering, Hebei University of Engineering, Handan 056038, China;

<sup>2</sup> Hebei Key Laboratory of Air Pollution Cause and Impact, Handan 056038, China;

<sup>3</sup> School of Chemical Engineering and Technology, Xi'an Jiaotong University, Xi'an 710049, China

\* Correspondence: zhanghaixia@hebeu.edu.cn (H.Z.); Yingqun\_Ma@xjtu.edu.cn (Y.M.)

**Table S1** Classification standard of *PI*, *I<sub>geo</sub>*, *NIPI*, *PLI* and *PERI*

| Class       | <i>PI</i>           | <i>I<sub>geo</sub></i>                    | <i>NIPI</i>         | <i>PLI</i>           | <i>PERI</i>            |                       |
|-------------|---------------------|-------------------------------------------|---------------------|----------------------|------------------------|-----------------------|
|             |                     |                                           |                     |                      | <i>E<sub>i</sub></i>   | <i>RI</i>             |
| Class I0-1: |                     | <0:                                       | ≤0.7 :              | ≤1:                  | $E_i < 40$ :           | $RI \leq 150$ :       |
|             | No pollution        | Uncontaminated                            | Safety              | Low level            | Low risk               | Low risk              |
| Class 1-2:  |                     | 0-1:                                      | 0.7–1.0 :           | 1.-2:                | $40 \leq E_i < 80$ :   | $150 < RI \leq 300$ : |
| II          | low pollution       | Uncontaminated to moderately contaminated | Precaution          | Moderate level       | Moderate risk          | Moderate risk         |
| Class 2-3:  |                     | 1-2:                                      | 1.0-2.0 :           | 2-5:                 | $80 \leq E_i < 160$ :  | $300 < RI \leq 600$ : |
| III         | Moderate pollution  | Moderately contaminated                   | Slightly pollution  | High level           | Considerable risk      | Considerable risk     |
| Class >3:   |                     | 2-3:                                      | 2.0-3.0 :           | >5:                  | $160 \leq E_i < 320$ : | $RI > 600$ :          |
| IV          | Heavy Contamination | Moderately to heavily contaminated        | Moderately polluted | Extremely high level | High risk              | high risk             |
| Class 3-4:  |                     |                                           | >3 :                |                      | $E_i \geq 320$ :       |                       |
| V           |                     | Heavily contaminated                      | Severely polluted   |                      | Very high risk         |                       |
| Class 4-5:  |                     |                                           |                     |                      |                        |                       |
| VI          |                     | Heavily to extremely contaminated         |                     |                      |                        |                       |
| Class >5:   |                     |                                           |                     |                      |                        |                       |
| VII         |                     | Extremely contaminated                    |                     |                      |                        |                       |

**Table S2** Abbreviation and reference values for health risk assessment parameters

| Parameter                    | Abbreviation | Unit                               | value           | References     |
|------------------------------|--------------|------------------------------------|-----------------|----------------|
| Soil ingestion rate          | IngR         | mg/day                             | children 200    | (MEPPRC, 2014) |
|                              |              |                                    | adult 100       |                |
| Exposure frequency           | EF           | day/year                           | 350             |                |
| Exposure duration            | ED           | year                               | children 6      | (MEPPRC, 2014) |
|                              |              |                                    | adult 24        |                |
| Exposure body weight         | EBW          | kg                                 | children 15.9   | (MEPPRC, 2014) |
|                              |              |                                    | adult 56.8      |                |
| Carcinogens average time     | AT           | day                                | 25550           | (US EPA, 2011) |
| non-carcinogens average time |              |                                    | $ED \times 365$ |                |
| Exposed skin surface area    | SA           | cm <sup>2</sup>                    | children 2448   | (MEPPRC, 2014) |
|                              |              |                                    | adult 5075      |                |
| Adherence factor             | AF           | mg/cm <sup>2</sup> ·day            | children 0.2    | (MEPPRC, 2014) |
|                              |              |                                    | adult 0.07      |                |
| Dermal absorption factor     | ABS          | unitless                           | 0.001           | (US EPA, 2011) |
| Soil inhalation rate         | InhR         | m <sup>3</sup> /day                | children 7.5    | (MEPPRC, 2014) |
|                              |              |                                    | adult 14.5      |                |
| Particle emission factor     | PEF          | 10 <sup>9</sup> m <sup>3</sup> /kg | 1.36            | (US EPA, 2002) |

MEPPRC, Technical Guidelines for Risk Assessment of Contaminated Sites, HJ 25.3-2014, 2014,  
US EPA, 2011. Exposure Factors Handbook, final ed. US Environmental Protection Agency, Washington, DC  
[EPA/600/R-09/052F].  
US EPA, 2002. Risk-based Concentration Table. United States Environmental Protection Agency, Washington DC.

**Table S3** Reference dose (RfD) and slope factor (SF) of each heavy metal

|                           | Cd                    | Cr                    | Cu                    | Mn                    | Ni                    | Pb                    | Zn                    |
|---------------------------|-----------------------|-----------------------|-----------------------|-----------------------|-----------------------|-----------------------|-----------------------|
| RfD for ingestion         | 1.00E-03 <sup>a</sup> | 3.00E-03 <sup>a</sup> | 4.00E-02 <sup>a</sup> | 4.60E-02 <sup>c</sup> | 2.00E-02 <sup>a</sup> | 3.50E-03 <sup>a</sup> | 3.00E-01 <sup>a</sup> |
| RfD for dermal absorption | 1.00E-05 <sup>a</sup> | 6.00E-05 <sup>a</sup> | 1.20E-02 <sup>a</sup> | 1.84E-03 <sup>c</sup> | 5.40E-03 <sup>a</sup> | 5.25E-04 <sup>a</sup> | 6.00E-02 <sup>a</sup> |
| RfD for inhalation        | 1.00E-05 <sup>a</sup> | 2.86E-05 <sup>a</sup> | 4.02E-02 <sup>b</sup> | 1.43E-05 <sup>c</sup> | 9.00E-05 <sup>a</sup> | 3.52E-03 <sup>b</sup> | 3.00E-01 <sup>c</sup> |
| SF for ingestion          | 6.10E+00 <sup>d</sup> | 5.00E-01 <sup>a</sup> | -                     |                       | 1.70E+00 <sup>c</sup> | 8.50E-03 <sup>a</sup> | -                     |
| SF for dermal absorption  | -                     | 2.00E+01 <sup>c</sup> | -                     |                       | 4.25E+01 <sup>c</sup> | -                     | -                     |
| SF for inhalation         | 6.30E+00 <sup>a</sup> | 4.20E+01 <sup>a</sup> | -                     |                       | 8.40E-01 <sup>a</sup> | -                     | -                     |

Note: -: not applicable.

<sup>a</sup> Chen, H., Teng, Y., Lu, S., Wang, Y., Wu, J., Wang, J. 2016. Source apportionment and health risk assessment of trace metals in surface soils of Beijing metropolitan, China. *Chemosphere* 144, 1002-1011.

<sup>b</sup> Li, H., Chen, L., Yu, L., Guo, Z., Shan, C., Lin, J., Gu, Y., Yang, Z., Yang, Y., Shao, J., Zhu, X., Chen, Z. 2017. Pollution characteristics and risk assessment of human exposure to oral bioaccessibility of heavy metals via urban street dusts from different functional areas in Chengdu, China. *Sci. Total Environ* 586, 1076-1084.

<sup>c</sup> Cao S., Duan X., Zhao X., Ma J., Dong T., Huang N., et al. Health risks from the exposure of children to As, Se, Pb and other heavy metals near the largest coking plant in China. *Sci. Total Environ.* 2014; 472: 1001-9.

<sup>d</sup> Yang, S., He, M., Zhi, Y., Chang, S., Gu, B., L, X. 2019. An integrated analysis on source-exposure risk of heavy metals in soils near intense electronic waste recycling activities. *Environ Pollut* 133, 105239.

<sup>e</sup> Teng, Y., Li, J., Wu, J., Lu, S., Wang, Y., Chen, H., 2015. Environmental distribution and associated human health risk due to trace elements and organic compounds in soil in Jiangxi province, China. *Ecotox. Environ. Safe.* 122, 406-416.

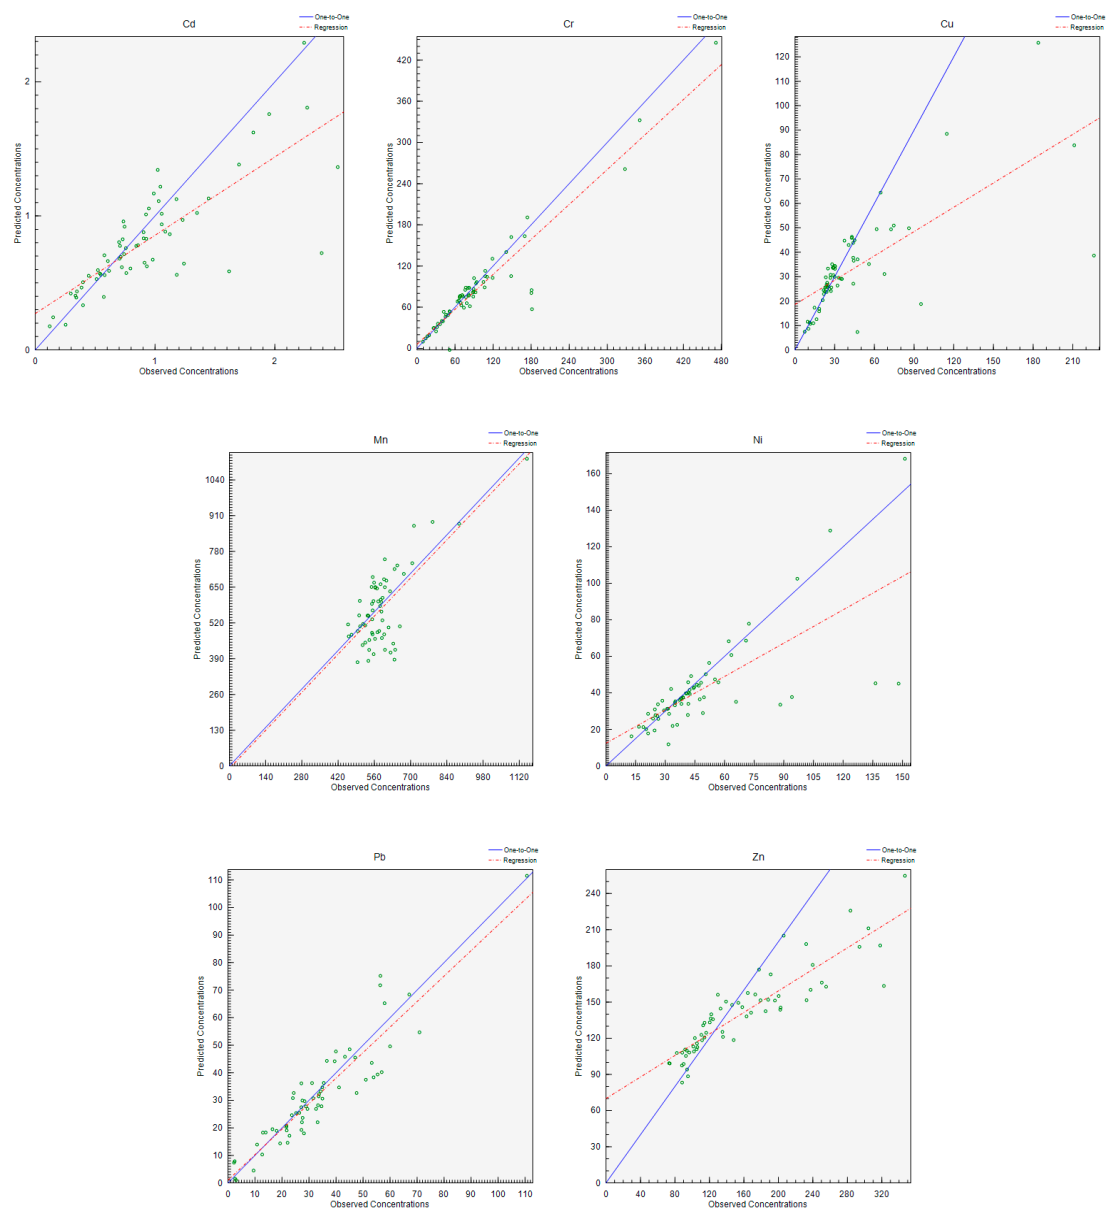

Figure. S1. Scatter plots of predicted and observed concentrations of species using the PMF model.
